1 **Title**

2 The Draft Reference Genome for *Hirudo verbana*, the Medicinal Leech

3 **Authors and Affiliations**

4 Riley T. Paulsen<sup>1,2</sup>, Diing D.M. Agany<sup>3</sup>, Jason Petersen<sup>4,5</sup>, Christel M. Davis<sup>4</sup>, Erik A. Ehli<sup>4,6</sup>,

5 Etienne Gnimpieba<sup>2,3</sup>, and Brian D. Burrell<sup>1,2\*</sup>

6 <sup>1</sup>Division of Basic Biomedical Sciences and Center for Brain and Behavior Research, Sanford

7 School of Medicine, University of South Dakota, Vermillion, SD, USA

8 <sup>2</sup>Center for Brain and Behavior Research, University of South Dakota, SD, USA

9 <sup>3</sup>Biomedical Engineering Program, University of South Dakota, Sioux Falls, SD, USA

10 <sup>4</sup>Avera Institute for Human Genetics, Sioux Falls, SD, USA

11 <sup>5</sup>Department of Internal Medicine, Sanford School of Medicine, University of South Dakota,

12 Sioux Falls, SD, USA

13 <sup>6</sup>Department of Psychiatry, Sanford School of Medicine, University of South Dakota, Sioux

14 Falls, SD, USA

15 **\* Corresponding author**

16 **E-mail:** [bburrell@usd.edu](mailto:bburrell@usd.edu) (BDB)

17

## 18 **Introduction**

19           The medicinal leech (*Hirudo verbana*) has been repurposed from an ancient bloodletting  
20 instrument [1] to a widely utilized invertebrate model system in biomedical research [2]. The  
21 well-documented and accessible central nervous system of the leech allows for precise selection  
22 of neurons for electrophysiological studies based on their characteristic morphologies,  
23 positioning, and biophysical properties [3, 4]. Fundamental discoveries have been made using  
24 *Hirudo* in a variety of disciplines that include central pattern generators, behavioral choice,  
25 learning and memory, synaptic signaling, neuroethology, neuro-injury and repair, and  
26 neurodevelopment [5-9]. Extensive research has also been devoted to examining the proteins  
27 secreted during leech hematophagy, which has longstanding applications in inflammation and  
28 coagulation [10]. Genomic insights into the medicinal leech will facilitate a more comprehensive  
29 approach into the evolutionary conservation of genes involved in the mechanistic processes that  
30 the medicinal leech has been used to help elucidate.

31           Despite these well-documented advantages of the medicinal leech for addressing various  
32 research questions, the leech lacks the molecular and genetic tools in comparison to alternative  
33 model organisms [11, 12]. For example, *Caenorhabditis elegans* and *Drosophila melanogaster*  
34 have extensive resources for targeted genome engineering in addition to optogenetic tools for  
35 electrophysiology and behavior manipulation [13-16]. Improving the genomic resources of  
36 organisms like the medicinal leech will promote more inclusive comparative genomics  
37 approaches to identifying conserved structural and functional gene signatures involved in human  
38 health and disease. Moreover, for many years, the medicinal leech community had been  
39 inadvertently aggregating four species of medicinal leeches: *H. medicinalis*, *H. verbana*, *H.*  
40 *orientalis*, and *H. troctina* [17-20]. This misunderstanding regarding the taxonomic classification

41 of these leech subspecies has led to some confusion surrounding appropriate cataloging of  
42 preliminary leech omics databases [21, 22]. Finally, in spite of the advancements in sequencing  
43 technology, most of the existing sequence repositories for the medicinal leeches have been  
44 comprised of expressed sequence tag [23] and transcriptomic databases [24], with many  
45 centering around *H. medicinalis* despite the prominence of *H. verbana* in neuroscience research  
46 [25]. This work presents the first draft genome for *H. verbana*, which consists of 250 Mbp,  
47 61,282 contigs, an N50 of 8,638 bp, and a GC content of 38%. This draft genome, in addition to  
48 the growing transcriptomic resources for *H. verbana* [26, 27] and draft genome assembly for *H.*  
49 *medicinalis* [28], will help accelerate studies seeking to link the molecular basis of previous and  
50 ongoing functional studies utilizing medicinal leeches.

## 51 **Materials and Methods**

52 Tissue collection and DNA extraction: High molecular weight genomic DNA was  
53 isolated from muscle of three specimens of *H. verbana* (obtained from Niagara Leeches,  
54 Cheyenne, WY) in separate preparations using the QIAamp DNA Mini Kit (Qiagen; Hilden,  
55 Germany). The DNA was pooled and 500 ng was utilized for sequencing library preparation.

56 Library preparation: Sequencing libraries were prepared using the TruSeq Synthetic  
57 Long-Read DNA Library Prep Kit (Illumina, Inc; San Diego CA). Three sequencing libraries  
58 were prepared following the manufacturer's recommendation. Briefly, the DNA was fragmented  
59 to approximately 8-10 kb and ligated with adapters, which mark the end of contigs during data  
60 analysis. Following a dilution to limit the number of DNA molecules in each well of a 384-well  
61 plate, long-range PCR was performed to enrich for DNA fragments with appropriate adapters.  
62 The DNA in each well was treated with the Nextera transposome, which fragments and  
63 simultaneously adds adapters to DNA. Indexing-PCR was used to barcode the DNA in each well

64 of the 384-well plate. The resulting products were pooled and bead size-selection was performed.  
65 The average size of the final libraries was ~725 bp as measured with a High Sensitivity DNA  
66 chip on a 2100 Bioanalyzer (Agilent; Santa Clara, CA). The concentration of each library was  
67 determined by quantitative PCR (qPCR) via the KAPA Library Quantification Kit for Next  
68 Generation Sequencing (KAPA Biosystems; Woburn, MA).

69 Whole genome sequencing: Libraries were normalized to 2 nmol/L in 10 mM Tris-Cl, pH  
70 8.5 with 0.1% Tween 20. Prior to cluster amplification, the libraries were denatured with 0.05 N  
71 NaOH and diluted to 20 pmol/L. Paired-end cluster generation of denatured templates was  
72 performed according to the manufacturer's instructions (Illumina, San Diego, CA) utilizing the  
73 HiSeq Rapid PE Cluster Kit v2 chemistry and flow cells. Libraries were optimally clustered at  
74 11 pmol/L with a 1% PhiX spike-in. Sequencing-by-synthesis was performed on a HiSeq 2500  
75 utilizing v2 chemistry with paired-end 101 bp reads and an 8 bp index read.

76 Long read and genome assembly: A total of 1,862,297,140 bp of 2 x 101 bp reads were  
77 obtained from three flow cells. Sequence read data were processed and converted to short-read  
78 FASTQ format by Illumina BaseSpace analysis software (v2.0.13). The short reads from each  
79 plate were individually processed in three runs to construct primary contigs using the TruSPAdes  
80 assembly software (v1.1.0) [29], and were combined using CLC-Bio Genomics Workbench *De*  
81 *Novo* Assembly (Qiagen, v11.0.1). Thorough quality control was performed on the raw short  
82 read data using FastQC (<http://www.bioinformatics.babraham.ac.uk/projects/fastqc/>) to assess  
83 the Phred score, presence of repeat reads, non-nucleotide content, GC content, and duplicated  
84 read contents. The quality of the primary contigs assembled by the TruSPAdes algorithm were  
85 assessed by Quast [30].

86           Repeat sequence and BUSCO annotation: Repeatmasker [31] was used to annotate  
87 repeating sequences and transposable elements in the *H. verbana* genome assembly.  
88 Repeatmasker was configured with the pooled databases RepBase [32] and Dfam-Consensus  
89 [33], RMBlast , and Tandem Repeats Finder. Additionally, the completeness and quality of the  
90 draft genome was evaluated using a BUSCO (Benchmarking Universal Single-Copy Orthologs)  
91 assessment that matched our newly assembled sequences to the metazoan OrthoDB v9.1 [34-36].  
92 BUSCO.v3 was configured using AUGUSTUS gene predictor [37], HMMER [38, 39], and  
93 NCBI-BLAST+ [40].

94           Functional annotation and orthologous analysis: In order to elucidate functional  
95 annotation and gene ontology annotation, NCBI Blast+, UniprotKB [41], and the Blast2GO  
96 software suite [42] integrated with InterProScan [43] were implemented. Furthermore, through  
97 locally constructed databases in CLC-Bio Genomics Workbench, we utilized NCBI Blastn [44]  
98 on our genome against closely related databases for the following closely related polychaete  
99 annelids: *H. medicinalis* (GenBank: EY478949-EY505781) , *Helobdella robusta*  
100 (GCA\_000326865.1), and *Capitella teleta* (GCA\_000328365.1).

101           Gene prediction and macro-synteny analysis: Gene predictions were performed using the  
102 MAKER2 [45] genome annotation pipeline with SNAP [46] against the nematode  
103 *Caenorhabditis elegans* and two other annelids: *C. teleta*, and *H. robusta*. The *ab-initio* gene  
104 predictor, SNAP, was trained three times to improve performance. The *H. verbana* draft genome  
105 assembly was aligned to the *C. elegans* genomes. Circos [47] was used to generate the circular  
106 genome alignment figures to analyze the anchoring of the top 600 *H. verbana* contigs onto the  
107 six chromosomes of *C. elegans* [48].

108           Phylogenetic reconstruction: OrthoFinder2 [49] was utilized for comparative genomics  
109 between our draft genome for *H. verbana*, and the protein sequence databases for six other  
110 organisms: *H. medicinalis*, *H. robusta*, *C. teleta*, *C. elegans* (GCA\_000002985.3), and the  
111 chordates *Mus musculus* (GCA\_000001635.8) and *Homo sapiens* (GCA\_000001405.27).  
112 Orthofinder was configured with the DIAMOND search engine [50], MCL clustering algorithm  
113 [51], and FastTree [52] to construct the rooted phylogenetic tree which was visualized with  
114 Phylo.io [53].

## 115 **Results, Discussion, Conclusions**

116           Next-generation sequencing leveraging an Illumina HiSeq-2500 platform was employed  
117 to construct the first draft genome for *H. verbana*, the medicinal leech. A total of 188 Gbp were  
118 generated that encompassed 1,862,297,140 bp of 101bp x 2 paired short reads (Table 1A).  
119 Quality control of the raw short reads performed by FastQC and MultiQC [54] revealed that the  
120 data had an average phred score >30 (S1 Appendix). The short reads were barcode assembled  
121 individually for each plate using TruSPAdes assembler software into TruSeq synthetic long  
122 reads. The long reads (Table 1B) were 190,514 bp, 198,741 bp, and 193,658 bp for each plate,  
123 respectively, and had an average N50 of 7623 bp. Together, these synthetic long reads consisted  
124 of 582,913 sequences, 3,429,493,670 bp, and had an estimated coverage of 6.9X. Quast  
125 assessment of both the synthetic long reads and final assembly maintained a phred score of 30.  
126 The draft genome was constructed from the TruSeq synthetic long reads using CLC-Bio  
127 Genomics Workbench to produce the draft genome assembly for *H. verbana*. Prior to arriving at  
128 the final assembly that used a combination of TruSPAdes synthetic long reads and CLC-Bio  
129 Genomics Workbench, we performed a thorough assessment of multiple assemblers using long  
130 reads formed both by Illumina BaseSpace analysis software and TruSPAdes in conjunction with

131 SOAPdenovo2 [55], Megahit [56], Spades [57], Ray [58], and Velvet [59]. Ultimately, we are  
132 reporting the TruSPAdes and CLC-Bio assembly approach because it had the most coverage and  
133 performed best under downstream assessment described below.

134 The final draft genome assembly presented here is 250,270,938 bp in size, which is  
135 comparable to the genome assembly statistics for other annelids *C. teleta* (240 Mbp) and *H.*  
136 *robusta* (310 Mbp). The genome assembly consists of 61,282 contigs that have a minimum  
137 length of 200 bp, a maximum length of 154,993 bp, and an N50 of 8,638 bp (Table 1C). For  
138 preliminary validation of the quality of the draft genome assembly, the 61,282 contigs were  
139 mapped back to the raw short reads using the mapping module in CLC-Bio Genomics  
140 Workbench. The result demonstrated that 86.72% of the assembly mapped back onto the short  
141 reads, leaving 13.28% unmapped. Among the contigs that were reported to map back, 85.77%  
142 had identical base pair matching.

143 Next, the repeating segments and transposable elements of the draft genome were  
144 annotated using RepeatMasker. An estimated 6.67% of the genome assembly (16,685,142 bp of  
145 the total 250 Mbp) was determined to be repetitive or transposable elements, with a majority  
146 consisting of simple repeats, interspersed repeats, and low complexity repeats (S1 Table).  
147 Moreover, the completeness of the draft genome was assessed with a BUSCO analysis for the  
148 presence of metazoan-specific orthologues. The metazoan BUSCO that we implemented  
149 consisted of 978 genes, and our assembly returned 809 (82.70%) as complete, 533 (54.50%) as  
150 complete and single-copy, 276 (28.20%) complete and duplicated, 70 (7.20%) fragmented, and  
151 99 (10.10%) as missing (Table 2A). Overall, our genome has a completeness score of 89.9%  
152 (82.70% complete + 7.20% fragmented).

153           The sequence homology and similarity of the draft genome for *H. verbana* was assessed  
154 by NCBI BLAST+ against the genomic and transcriptomic sequences available for *H.*  
155 *medicinalis*, *H. robusta*, and *C. teleta*. Approximately 94% of the draft genome sequences had an  
156 identity match within the queried databases, 5.5% exhibited at least 70% similarity, and the  
157 remaining 0.5% was unidentified. Functional annotation was assessed using fast-BlastX [60]  
158 against the Animalia NCBI Refseq database in Blast2GO [61]. From total assembly, 1,178  
159 contigs returned significant blast hits at an e-value threshold of  $10^{-10}$ . The top 20 gene ontology  
160 (GO) terms [62] for each classification – biological process (BP), molecular function (MF), and  
161 cellular component (CC) – at GO level 5 are displayed in Fig. 1. Moreover, the draft genome was  
162 aligned to the genome of *C. elegans*. The draft genome contigs for *H. verbana* were mapped and  
163 anchored to the 6 chromosomes of *C. elegans* (Fig. 2A). A majority of the mapped sequences  
164 achieved better fit onto chromosomes I and X of the *C. elegans* genome (S2 Table).

165           Using OrthoFinder, orthologues were generated from gene families of our draft genome  
166 for *H. verbana*, *H. medicinalis*, *H. robusta*, *C. teleta*, *C. elegans*, *M. musculus*, and *H. sapiens*.  
167 The phylogenetic tree was reconstructed using OrthoFinder after it identified the highest similarity  
168 content between the draft genome and the reference organisms. The phylogenetic tree (Fig. 2B)  
169 appropriately placed *H. verbana* adjacent to its closest relative, *H. medicinalis*, demonstrating  
170 their last known divergence in genus *Hirudo*. Predictive protein-coding gene sequences were  
171 identified based on conserved protein signatures and domains with UniprotKB, Blast2Go, and  
172 InterProScan. A total of 84.53% of the contigs were annotated for a protein-coding function, of  
173 these, 8.16% were identified by InterProScan, 4.57% by Blast2GO, and 71.80% by UniProtKB  
174 (Table 2B). Lastly, two-pass annotation in MAKER predicted 26,210 protein-coding genes in the



175 draft genome, which is similar to the first reports of draft genomes for fellow lophotrochozoans  
176 *C. teleta*, *H. robusta*, and *L. gigantea*, a gastropod mollusc (Table 2C).

177 This study is the first to publish an annotated draft genome sequence for the medicinal  
178 leech, *H. verbana*. Overall, the genome assembly consists of 250 Mbp and 61,282 contigs,  
179 84.53% of which have been predicted to contain a protein-coding function. The draft genome is  
180 also predicted to contain 26,210 protein-coding genes and a repetitive content of 6.67%. The raw  
181 short-read sequence data, synthetic long-reads, and assembled contigs for the present study have  
182 been deposited into NCBI under BioProject PRJNA551036. The draft genome assembly will  
183 assist in providing tools to understand the underlying molecular processes involved in ongoing  
184 studies in neurophysiology, developmental biology, and neuroethology that utilize *H. verbana*  
185 [63-66]. Whole-genome characterization for Hirudinae *H. medicinalis*, *H. manillensis* [67] and  
186 *H. verbana* is expanding and will help distinguish and clarify distinct genetic undertones of these  
187 previously amalgamated species. Future efforts to better annotate and complete a genome for *H.*  
188 *verbana* will enable insight into genetic mechanisms of processes investigated with this model  
189 organism [66, 68, 69], and advance more robust cross-species validation of comparative  
190 principles in next-generation biomedical research techniques.

## 191 **Acknowledgements**

192 This work was supported by a pilot grant from the University of South Dakota (USD) Center for  
193 Brain and Behavior Research (CBBRe), the USD Neuroscience, Nanotechnology, and Networks  
194 Program (DGE-1633213), and the National Science Foundation Graduate Research Fellowship  
195 (DGE-1545679). Authors acknowledge the use of computational resources of the USD HPC  
196 cluster and the Extreme Science and Engineering Discovery Environment (XSEDE), which is  
197 supported by the National Science Foundation grant number ACI-1548562.

198 **Literature Cited**

- 199 1. Phillips, A.J. and M.E. Siddall, *Poly-paraphyly of Hirudinidae: many lineages of*  
200 *medicinal leeches*. BMC Evol Biol, 2009. **9**: p. 246.
- 201 2. Wagenaar, D.A., *A classic model animal in the 21st century: recent lessons from the*  
202 *leech nervous system*. J Exp Biol, 2015. **218**(Pt 21): p. 3353-9.
- 203 3. Nicholls, J.G. and D.A. Baylor, *Specific modalities and receptive fields of sensory*  
204 *neurons in CNS of the leech*. J Neurophysiol, 1968. **31**(5): p. 740-56.
- 205 4. Kristan, W.B., *Neuronal changes related to behavioral changes in chronically isolated*  
206 *segments of the medicinal leech*. Brain Research, 1979. **167**(1): p. 215-220.
- 207 5. Kristan, W.B., Jr., R.L. Calabrese, and W.O. Friesen, *Neuronal control of leech behavior*.  
208 Prog Neurobiol, 2005. **76**(5): p. 279-327.
- 209 6. Crisp, K.M. and B.D. Burrell, *Cellular and Behavioral Properties of Learning in Leech*  
210 *and Other Annelids* in *Annelids in Modern Biology*, D.H. Shain, Editor. 2009, John Wiley  
211 & Sons: New York.
- 212 7. Duan, Y., et al., *Repair and regeneration of functional synaptic connections: cellular and*  
213 *molecular interactions in the leech*. Cell Mol Neurobiol, 2005. **25**(2): p. 441-50.
- 214 8. Eisenhart, F.J., T.W. Cacciatore, and W.B. Kristan, Jr., *A central pattern generator*  
215 *underlies crawling in the medicinal leech*. J Comp Physiol A, 2000. **186**(7-8): p. 631-43.
- 216 9. Yuan, S. and B.D. Burrell, *Nonnociceptive afferent activity depresses nocifensive*  
217 *behavior and nociceptive synapses via an endocannabinoid-dependent mechanism*. J  
218 Neurophysiol, 2013. **110**(11): p. 2607-16.

- 219 10. Lemke, S., et al., *May salivary gland secretory proteins from hematophagous leeches*  
220 *(Hirudo verbana) reach pharmacologically relevant concentrations in the vertebrate*  
221 *host?* PLoS One, 2013. **8**(9): p. e73809.
- 222 11. Nobrega, M.A. and L.A. Pennacchio, *Comparative genomic analysis as a tool for*  
223 *biological discovery.* J Physiol, 2004. **554**(Pt 1): p. 31-9.
- 224 12. Clarke, S.L., et al., *Human developmental enhancers conserved between deuterostomes*  
225 *and protostomes.* PLoS Genet, 2012. **8**(8): p. e1002852.
- 226 13. Dickinson, D.J. and B. Goldstein, *CRISPR-Based Methods for Caenorhabditis elegans*  
227 *Genome Engineering.* Genetics, 2016. **202**(3): p. 885-901.
- 228 14. Gratz, S.J., et al., *CRISPR-Cas9 Genome Editing in Drosophila.* Curr Protoc Mol Biol,  
229 2015. **111**: p. 31 2 1-31 2 20.
- 230 15. Simpson, J.H. and L.L. Looger, *Functional Imaging and Optogenetics in Drosophila.*  
231 *Genetics*, 2018. **208**(4): p. 1291-1309.
- 232 16. Leifer, A.M., et al., *Optogenetic manipulation of neural activity in freely moving*  
233 *Caenorhabditis elegans.* Nat Methods, 2011. **8**(2): p. 147-52.
- 234 17. Kutschera, U. and J. Elliott, *The European medicinal leech Hirudo medicinalis L.:*  
235 *Morphology and occurrence of an endangered species.* Zoosystematics and Evolution,  
236 2014. **90**(2): p. 271-280.
- 237 18. Siddall, M.E., et al., *Diverse molecular data demonstrate that commercially available*  
238 *medicinal leeches are not Hirudo medicinalis.* Proc Biol Sci, 2007. **274**(1617): p. 1481-7.
- 239 19. Petrauskienė, L., O. Utevskaja, and S. Utevskij, *Can different species of medicinal leeches*  
240 *(Hirudo spp.) interbreed?* Invertebrate Biology, 2009. **128**(4): p. 324-331.

- 241 20. Trontelj, P. and S.Y. Utevsky, *Phylogeny and phylogeography of medicinal leeches*  
242 *(genus Hirudo): fast dispersal and shallow genetic structure*. Mol Phylogenet Evol, 2012.  
243 **63**(2): p. 475-85.
- 244 21. Trontelj, P. and S.Y. Utevsky, *Celebrity with a neglected taxonomy: molecular*  
245 *systematics of the medicinal leech (genus Hirudo)*. Mol Phylogenet Evol, 2005. **34**(3): p.  
246 616-24.
- 247 22. Bely, A.E. and D.A. Weisblat, *Lessons from leeches: a call for DNA barcoding in the*  
248 *lab*. Evol Dev, 2006. **8**(6): p. 491-501.
- 249 23. Macagno, E.R., et al., *Construction of a medicinal leech transcriptome database and its*  
250 *application to the identification of leech homologs of neural and innate immune genes*.  
251 BMC Genomics, 2010. **11**: p. 407.
- 252 24. Babenko, V.V., et al., *Draft genome sequences of Hirudo medicinalis and salivary*  
253 *transcriptome of three closely related medicinal leeches*. BMC Genomics, 2020. **21**(1): p.  
254 331.
- 255 25. Hibsh, D., et al., *De novo transcriptome assembly databases for the central nervous*  
256 *system of the medicinal leech*. Sci Data, 2015. **2**: p. 150015.
- 257 26. Northcutt, A.J., et al., *An annotated CNS transcriptome of the medicinal leech, Hirudo*  
258 *verbana: De novo sequencing to characterize genes associated with nervous system*  
259 *activity*. PLoS One, 2018. **13**(7): p. e0201206.
- 260 27. Stowasser, A., et al., *Electrophysiology and transcriptomics reveal two photoreceptor*  
261 *classes and complex visual integration in Hirudo verbana*. J Exp Biol, 2019. **222**(Pt 15).

- 262 28. Kvist, S., et al., *Draft genome of the European medicinal leech *Hirudo medicinalis**  
263 *(Annelida, Clitellata, Hirudiniformes) with emphasis on anticoagulants*. Sci Rep, 2020.  
264 **10**(1): p. 9885.
- 265 29. Bankevich, A. and P.A. Pevzner, *TruSPAdes: barcode assembly of TruSeq synthetic long*  
266 *reads*. Nat Methods, 2016. **13**(3): p. 248-50.
- 267 30. Gurevich, A., et al., *QUAST: quality assessment tool for genome assemblies*.  
268 Bioinformatics, 2013. **29**(8): p. 1072-5.
- 269 31. Tarailo-Graovac, M. and N. Chen, *Using RepeatMasker to identify repetitive elements in*  
270 *genomic sequences*. Curr Protoc Bioinformatics, 2009. **Chapter 4**: p. Unit 4 10.
- 271 32. Jurka, J., et al., *Rebase Update, a database of eukaryotic repetitive elements*. Cytogenet  
272 Genome Res, 2005. **110**(1-4): p. 462-7.
- 273 33. Hubley, R., et al., *The Dfam database of repetitive DNA families*. Nucleic Acids Res,  
274 2016. **44**(D1): p. D81-9.
- 275 34. Simao, F.A., et al., *BUSCO: assessing genome assembly and annotation completeness*  
276 *with single-copy orthologs*. Bioinformatics, 2015. **31**(19): p. 3210-2.
- 277 35. Waterhouse, R.M., et al., *BUSCO Applications from Quality Assessments to Gene*  
278 *Prediction and Phylogenomics*. Mol Biol Evol, 2018. **35**(3): p. 543-548.
- 279 36. Zdobnov, E.M., et al., *OrthoDB v9.1: cataloging evolutionary and functional annotations*  
280 *for animal, fungal, plant, archaeal, bacterial and viral orthologs*. Nucleic Acids Res,  
281 2017. **45**(D1): p. D744-D749.
- 282 37. Stanke, M., A. Tzvetkova, and B. Morgenstern, *AUGUSTUS at EGASP: using EST,*  
283 *protein and genomic alignments for improved gene prediction in the human genome*.  
284 Genome Biol, 2006. **7 Suppl 1**: p. S11 1-8.

- 285 38. Potter, S.C., et al., *HMMER web server: 2018 update*. Nucleic Acids Res, 2018. **46**(W1):  
286 p. W200-W204.
- 287 39. Finn, R.D., J. Clements, and S.R. Eddy, *HMMER web server: interactive sequence*  
288 *similarity searching*. Nucleic Acids Res, 2011. **39**(Web Server issue): p. W29-37.
- 289 40. Camacho, C., et al., *BLAST+: architecture and applications*. BMC Bioinformatics, 2009.  
290 **10**: p. 421.
- 291 41. UniProt, C., *UniProt: a worldwide hub of protein knowledge*. Nucleic Acids Res, 2019.  
292 **47**(D1): p. D506-D515.
- 293 42. Gotz, S., et al., *High-throughput functional annotation and data mining with the*  
294 *Blast2GO suite*. Nucleic Acids Res, 2008. **36**(10): p. 3420-35.
- 295 43. Jones, P., et al., *InterProScan 5: genome-scale protein function classification*.  
296 Bioinformatics, 2014. **30**(9): p. 1236-40.
- 297 44. Johnson, M., et al., *NCBI BLAST: a better web interface*. Nucleic Acids Res, 2008.  
298 **36**(Web Server issue): p. W5-9.
- 299 45. Holt, C. and M. Yandell, *MAKER2: an annotation pipeline and genome-database*  
300 *management tool for second-generation genome projects*. BMC Bioinformatics, 2011.  
301 **12**: p. 491.
- 302 46. Korf, I., *Gene finding in novel genomes*. BMC Bioinformatics, 2004. **5**: p. 59.
- 303 47. Krzywinski, M., et al., *Circos: an information aesthetic for comparative genomics*.  
304 Genome Res, 2009. **19**(9): p. 1639-45.
- 305 48. Hillier, L.W., et al., *Genomics in C. elegans: so many genes, such a little worm*. Genome  
306 Res, 2005. **15**(12): p. 1651-60.

- 307 49. Emms, D.M. and S. Kelly, *OrthoFinder: phylogenetic orthology inference for*  
308 *comparative genomics*. Genome Biol, 2019. **20**(1): p. 238.
- 309 50. Buchfink, B., C. Xie, and D.H. Huson, *Fast and sensitive protein alignment using*  
310 *DIAMOND*. Nat Methods, 2015. **12**(1): p. 59-60.
- 311 51. Enright, A.J., S. Van Dongen, and C.A. Ouzounis, *An efficient algorithm for large-scale*  
312 *detection of protein families*. Nucleic Acids Res, 2002. **30**(7): p. 1575-84.
- 313 52. Price, M.N., P.S. Dehal, and A.P. Arkin, *FastTree 2--approximately maximum-likelihood*  
314 *trees for large alignments*. PLoS One, 2010. **5**(3): p. e9490.
- 315 53. Robinson, O., D. Dylus, and C. Dessimoz, *Phylo.io: Interactive Viewing and Comparison*  
316 *of Large Phylogenetic Trees on the Web*. Mol Biol Evol, 2016. **33**(8): p. 2163-6.
- 317 54. Ewels, P., et al., *MultiQC: summarize analysis results for multiple tools and samples in a*  
318 *single report*. Bioinformatics, 2016. **32**(19): p. 3047-8.
- 319 55. Luo, R., et al., *SOAPdenovo2: an empirically improved memory-efficient short-read de*  
320 *novo assembler*. Gigascience, 2012. **1**(1): p. 18.
- 321 56. Li, D., et al., *MEGAHIT: an ultra-fast single-node solution for large and complex*  
322 *metagenomics assembly via succinct de Bruijn graph*. Bioinformatics, 2015. **31**(10): p.  
323 1674-6.
- 324 57. Bankevich, A., et al., *SPAdes: a new genome assembly algorithm and its applications to*  
325 *single-cell sequencing*. J Comput Biol, 2012. **19**(5): p. 455-77.
- 326 58. Boisvert, S., F. Laviolette, and J. Corbeil, *Ray: simultaneous assembly of reads from a*  
327 *mix of high-throughput sequencing technologies*. J Comput Biol, 2010. **17**(11): p. 1519-  
328 33.

- 329 59. Zerbino, D.R. and E. Birney, *Velvet: algorithms for de novo short read assembly using de*  
330 *Bruijn graphs*. Genome Res, 2008. **18**(5): p. 821-9.
- 331 60. Price, M.N., P.S. Dehal, and A.P. Arkin, *FastBLAST: homology relationships for millions*  
332 *of proteins*. PLoS One, 2008. **3**(10): p. e3589.
- 333 61. O'Leary, N.A., et al., *Reference sequence (RefSeq) database at NCBI: current status,*  
334 *taxonomic expansion, and functional annotation*. Nucleic Acids Res, 2016. **44**(D1): p.  
335 D733-45.
- 336 62. Harris, M.A., et al., *The Gene Ontology (GO) database and informatics resource*.  
337 Nucleic Acids Res, 2004. **32**(Database issue): p. D258-61.
- 338 63. Harley, C.M. and D.A. Wagenaar, *Scanning behavior in the medicinal leech *Hirudo**  
339 *verbana*. PLoS One, 2014. **9**(1): p. e86120.
- 340 64. Yazdani, N., et al., *Expression of a dominant negative mutant innexin in identified*  
341 *neurons and glial cells reveals selective interactions among gap junctional proteins*. Dev  
342 Neurobiol, 2013. **73**(8): p. 571-86.
- 343 65. Yuan, S. and B.D. Burrell, *Endocannabinoid-dependent long-term depression in a*  
344 *nociceptive synapse requires coordinated presynaptic and postsynaptic transcription and*  
345 *translation*. J Neurosci, 2013. **33**(10): p. 4349-58.
- 346 66. Baranzini, N., et al., *Antimicrobial Role of RNASET2 Protein During Innate Immune*  
347 *Response in the Medicinal Leech *Hirudo verbana**. Front Immunol, 2020. **11**: p. 370.
- 348 67. Guan, D.L., et al., *Draft Genome of the Asian Buffalo Leech *Hirudinaria manillensis**.  
349 Front Genet, 2019. **10**: p. 1321.
- 350 68. Grey, K.B., B.L. Moss, and B.D. Burrell, *Molecular identification and expression of the*  
351 *NMDA receptor NR1 subunit in the leech*. Invert Neurosci, 2009. **9**(1): p. 11-20.



- 352 69. Kabeiseman, E., R. Paulsen, and B.D. Burrell, *Characterization of a monoacylglycerol*  
353 *lipase in the medicinal leech, Hirudo verbana*. *Comp Biochem Physiol B Biochem Mol*  
354 *Biol*, 2020. **243-244**: p. 110433.

355

356

357 **Figure Legends**

358 **Figure 1** – *H. verbana* draft genome gene ontology distribution for the top 20 most abundant  
359 sequence annotations for each classification (biological process, molecular function, and cellular  
360 component) at GO level 5.

361

362 **Figure 2** – (A) Alignment of *H. verbana* draft genome contigs to the chromosomes (I-X) of *C.*  
363 *elegans* (B) Reconstructed phylogenic tree based on orthologous gene families.

**Table 1: Statistics of the *de novo* draft genome assembly for *Hirudo verbana*****(A) Genome sequencing reads obtained from Illumina HiSeq via Basespace**

|             | Reads (Single, 101bp) | Reads (Pair, 101bp x 2) | Bases (Pair)    |
|-------------|-----------------------|-------------------------|-----------------|
| Plate 1     | 266,688,108           | 533,376,216             | 53,870,997,816  |
| Plate 2     | 328,593,254           | 657,186,508             | 66,375,837,308  |
| Plate 3     | 335,867,208           | 671,734,416             | 67,845,176,016  |
| Total reads | 931,148,570           | 1,862,297,140           | 188,092,011,140 |

**(B) TruSPAdes Truseq Synthetic Long-Read Assembly Statistics**

|         | Assembled reads | Total bases   | N50   |
|---------|-----------------|---------------|-------|
| Plate 1 | 190,514         | 1,117,298,449 | 7,612 |
| Plate 2 | 198,741         | 1,172,622,590 | 7,634 |
| Plate 3 | 193,658         | 1,139,572,631 | 7,624 |

**(C) Summary details of *Hirudo verbana* draft genome assembly**

|                       |           |
|-----------------------|-----------|
| Estimated genome size | 250 Mb    |
| Total assembly length | 250 Mb    |
| Total sequences       | 582,913   |
| Short read coverage   | 627X      |
| Long read coverage    | 6.9X      |
| Contigs               | 61,282    |
| N75                   | 4807 bp   |
| N50                   | 8638 bp   |
| N25                   | 14800 bp  |
| Minimum contig        | 200 bp    |
| Maximum contig        | 154993 bp |
| Average               | 4084 bp   |
| Nucleotide frequency  |           |
| Adenine (A)           | 30.90%    |
| Cytosine (C)          | 19.10%    |
| Guanine (G)           | 19.00%    |
| Thymine (T)           | 31.00%    |

bioRxiv preprint doi: <https://doi.org/10.1101/2020.12.08.416024>; this version posted December 8, 2020. The copyright holder for this preprint (which was not certified by peer review) is the author/funder, who has granted bioRxiv a license to display the preprint in perpetuity. It is made available under aCC-BY 4.0 International license.

Table 1 - (A) Whole genome sequencing reads obtained from Illumina HiSeq for *H. verbana de novo* draft genome assembly (B) Statistics for barcode-assembled synthetic long reads generated using TruSPAdes (C) Summary of assembly statistics of the draft genome for *H. verbana*.

**Table 2: Analysis of the completeness and orthology of *H. verbana* genome**

(A) BUSCO statistics of genome based on 978 metazoan-conserved genes

| BUSCO                               | Genes Present | Percentage (%) |
|-------------------------------------|---------------|----------------|
| Complete BUSCOs (C)                 | 809           | 82.70%         |
| Complete and Single-copy BUSCOs (S) | 533           | 54.50%         |
| Complete and duplicated BUSCOs (D)  | 276           | 28.20%         |
| Fragmented BUSCOs (F)               | 70            | 7.20%          |
| Missing BUSCOs (M)                  | 99            | 10.10%         |

(B) Genome functional annotation

|              | Number of contigs | Percentage (%) |
|--------------|-------------------|----------------|
| Total        | 61,282            |                |
| Annotated    |                   |                |
| InterProScan | 5,000             | 8.16%          |
| GO           | 2,800             | 4.57%          |
| UniProtKB    | 44,000            | 71.80%         |
| Unannotated  | 9,482             | 15.47%         |

bioRxiv preprint doi: <https://doi.org/10.1101/2020.12.08.416024>; this version posted December 8, 2020. The copyright holder for this preprint (which was not certified by peer review) is the author/funder, who has granted bioRxiv a license to display the preprint in perpetuity. It is made available under aCC-BY 4.0 International license.

(C) Comparison of gene prediction and annotation to related organisms

| Species                   | Size of genome assembly (Mbp) | Predicted number of genes |
|---------------------------|-------------------------------|---------------------------|
| <i>Lottia gigantea</i>    | 348                           | 23,800                    |
| <i>Capitella teleta</i>   | 324                           | 32,389                    |
| <i>Helobdella robusta</i> | 228                           | 23,400                    |
| <i>Hirudo verbana</i>     | 250                           | 26,210                    |

Table 2 - (A) BUSCO statistics assessing the completeness of the *H. verbana* draft genome based on 978 metazoan-conserved genes (B) Summary of structural functional annotation for *H. verbana* draft genome (C) Comparison of *H. verbana* draft genome size and predicted number of genes to 3 closely related spiralian genomes (two annelids and one mollusc).

# GO Distribution by Level (5) - Top 20

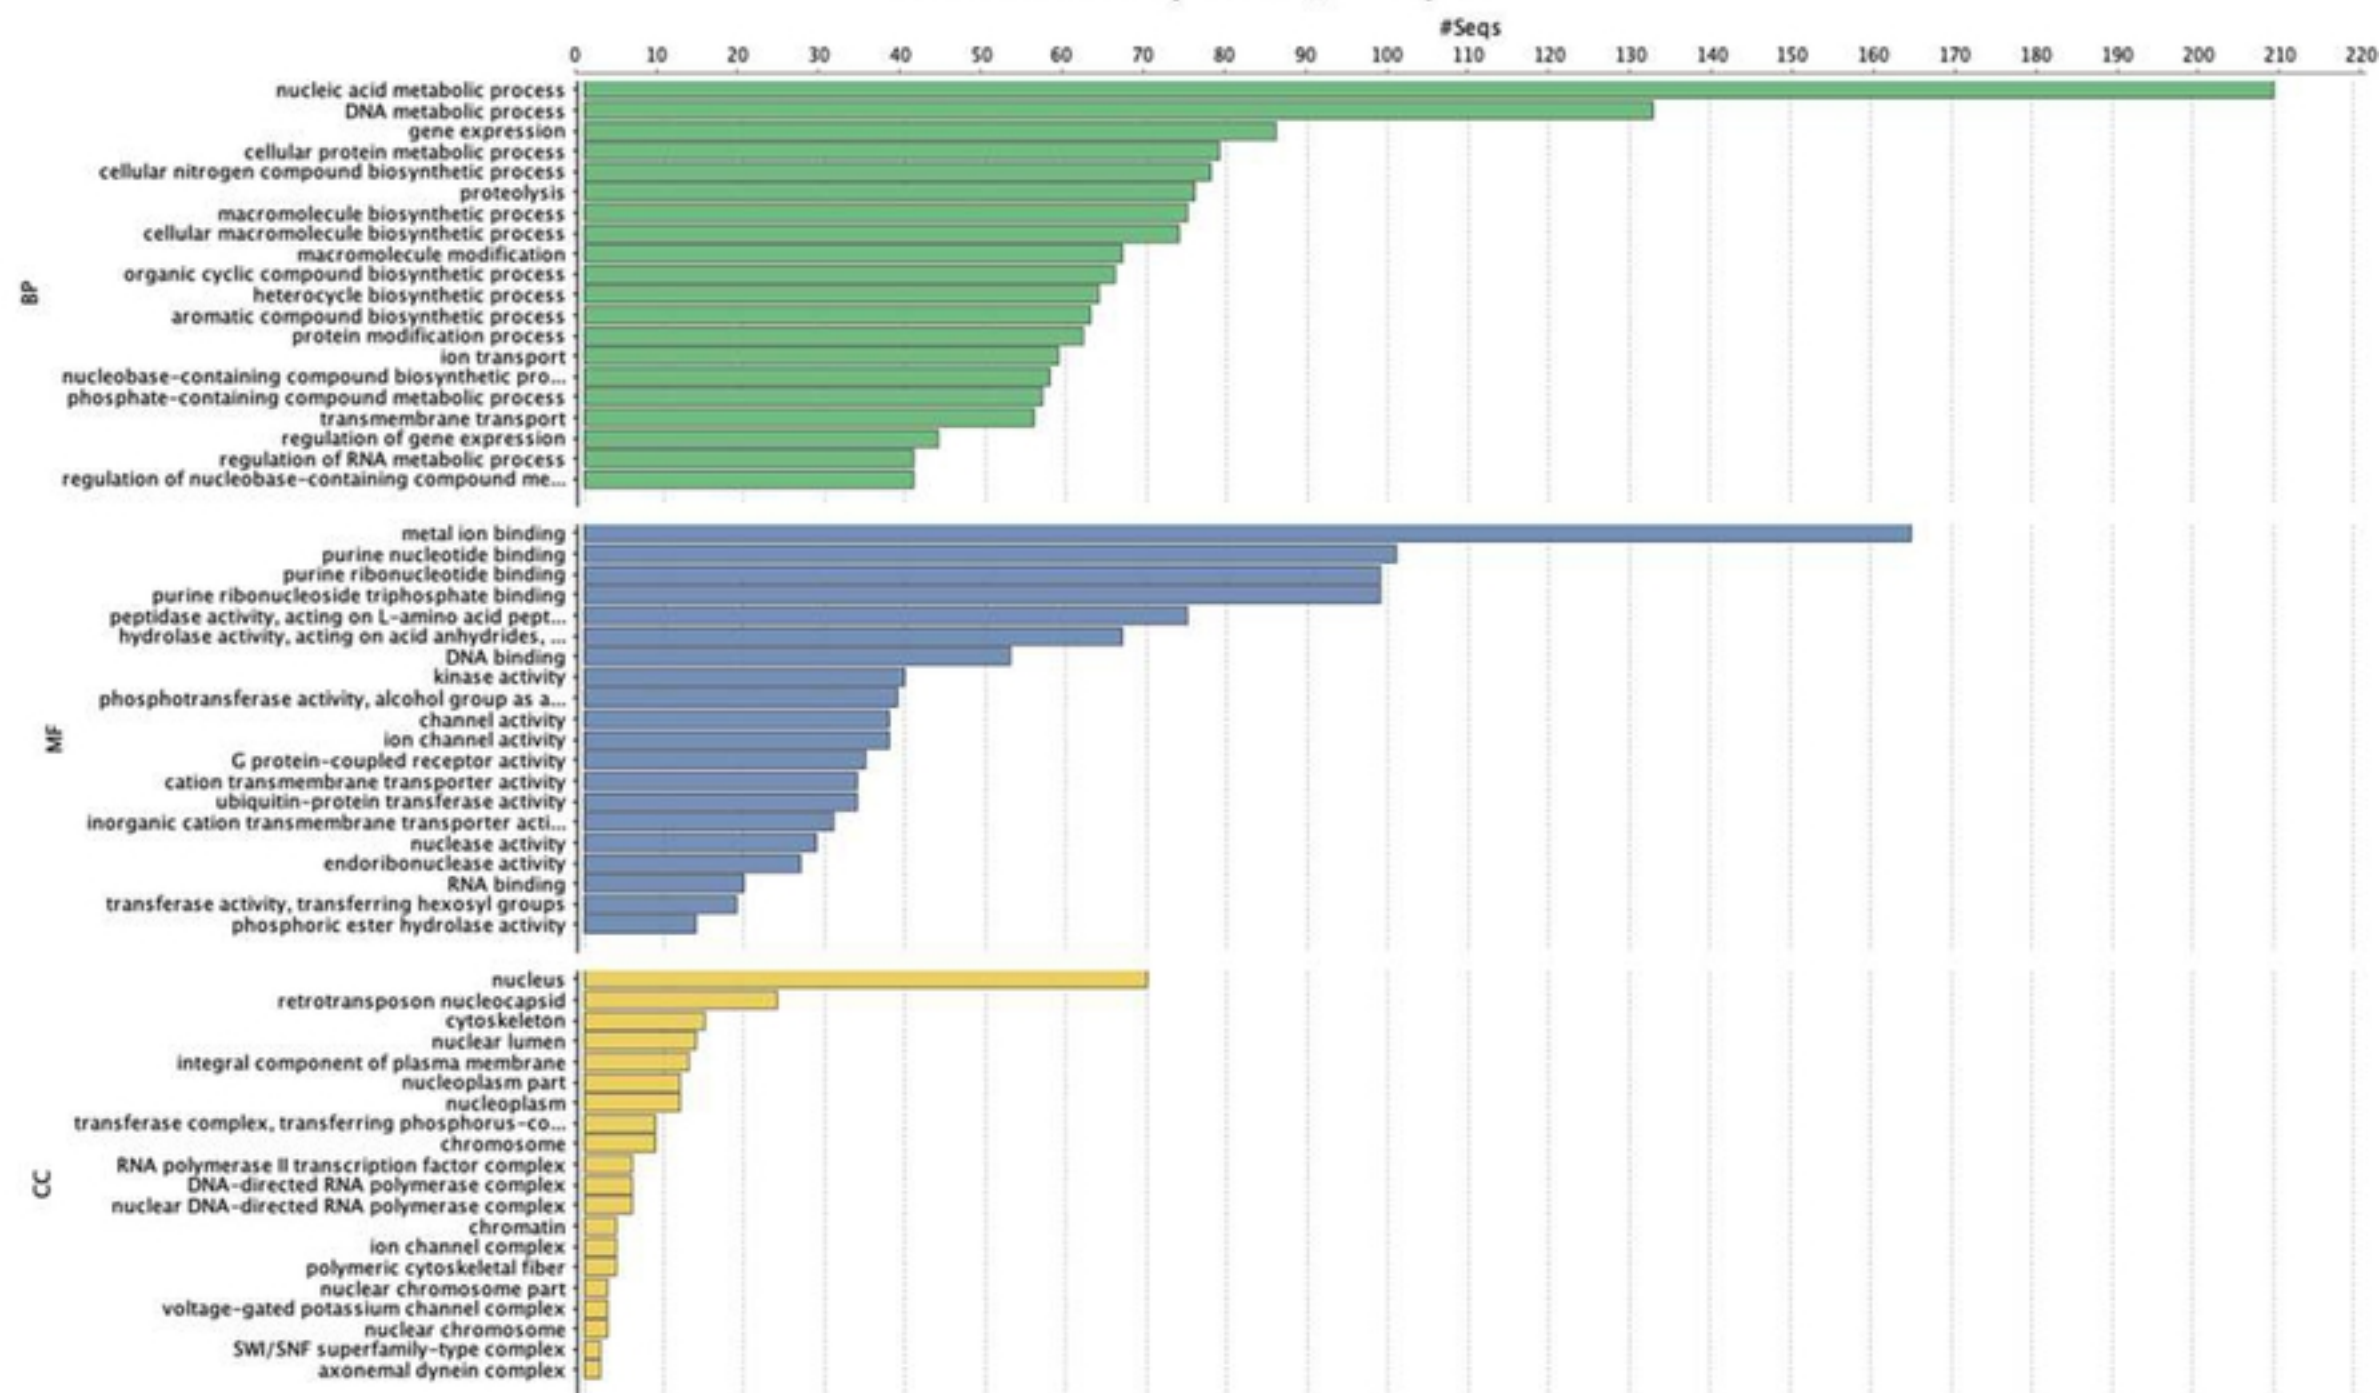

Figure 1

**A**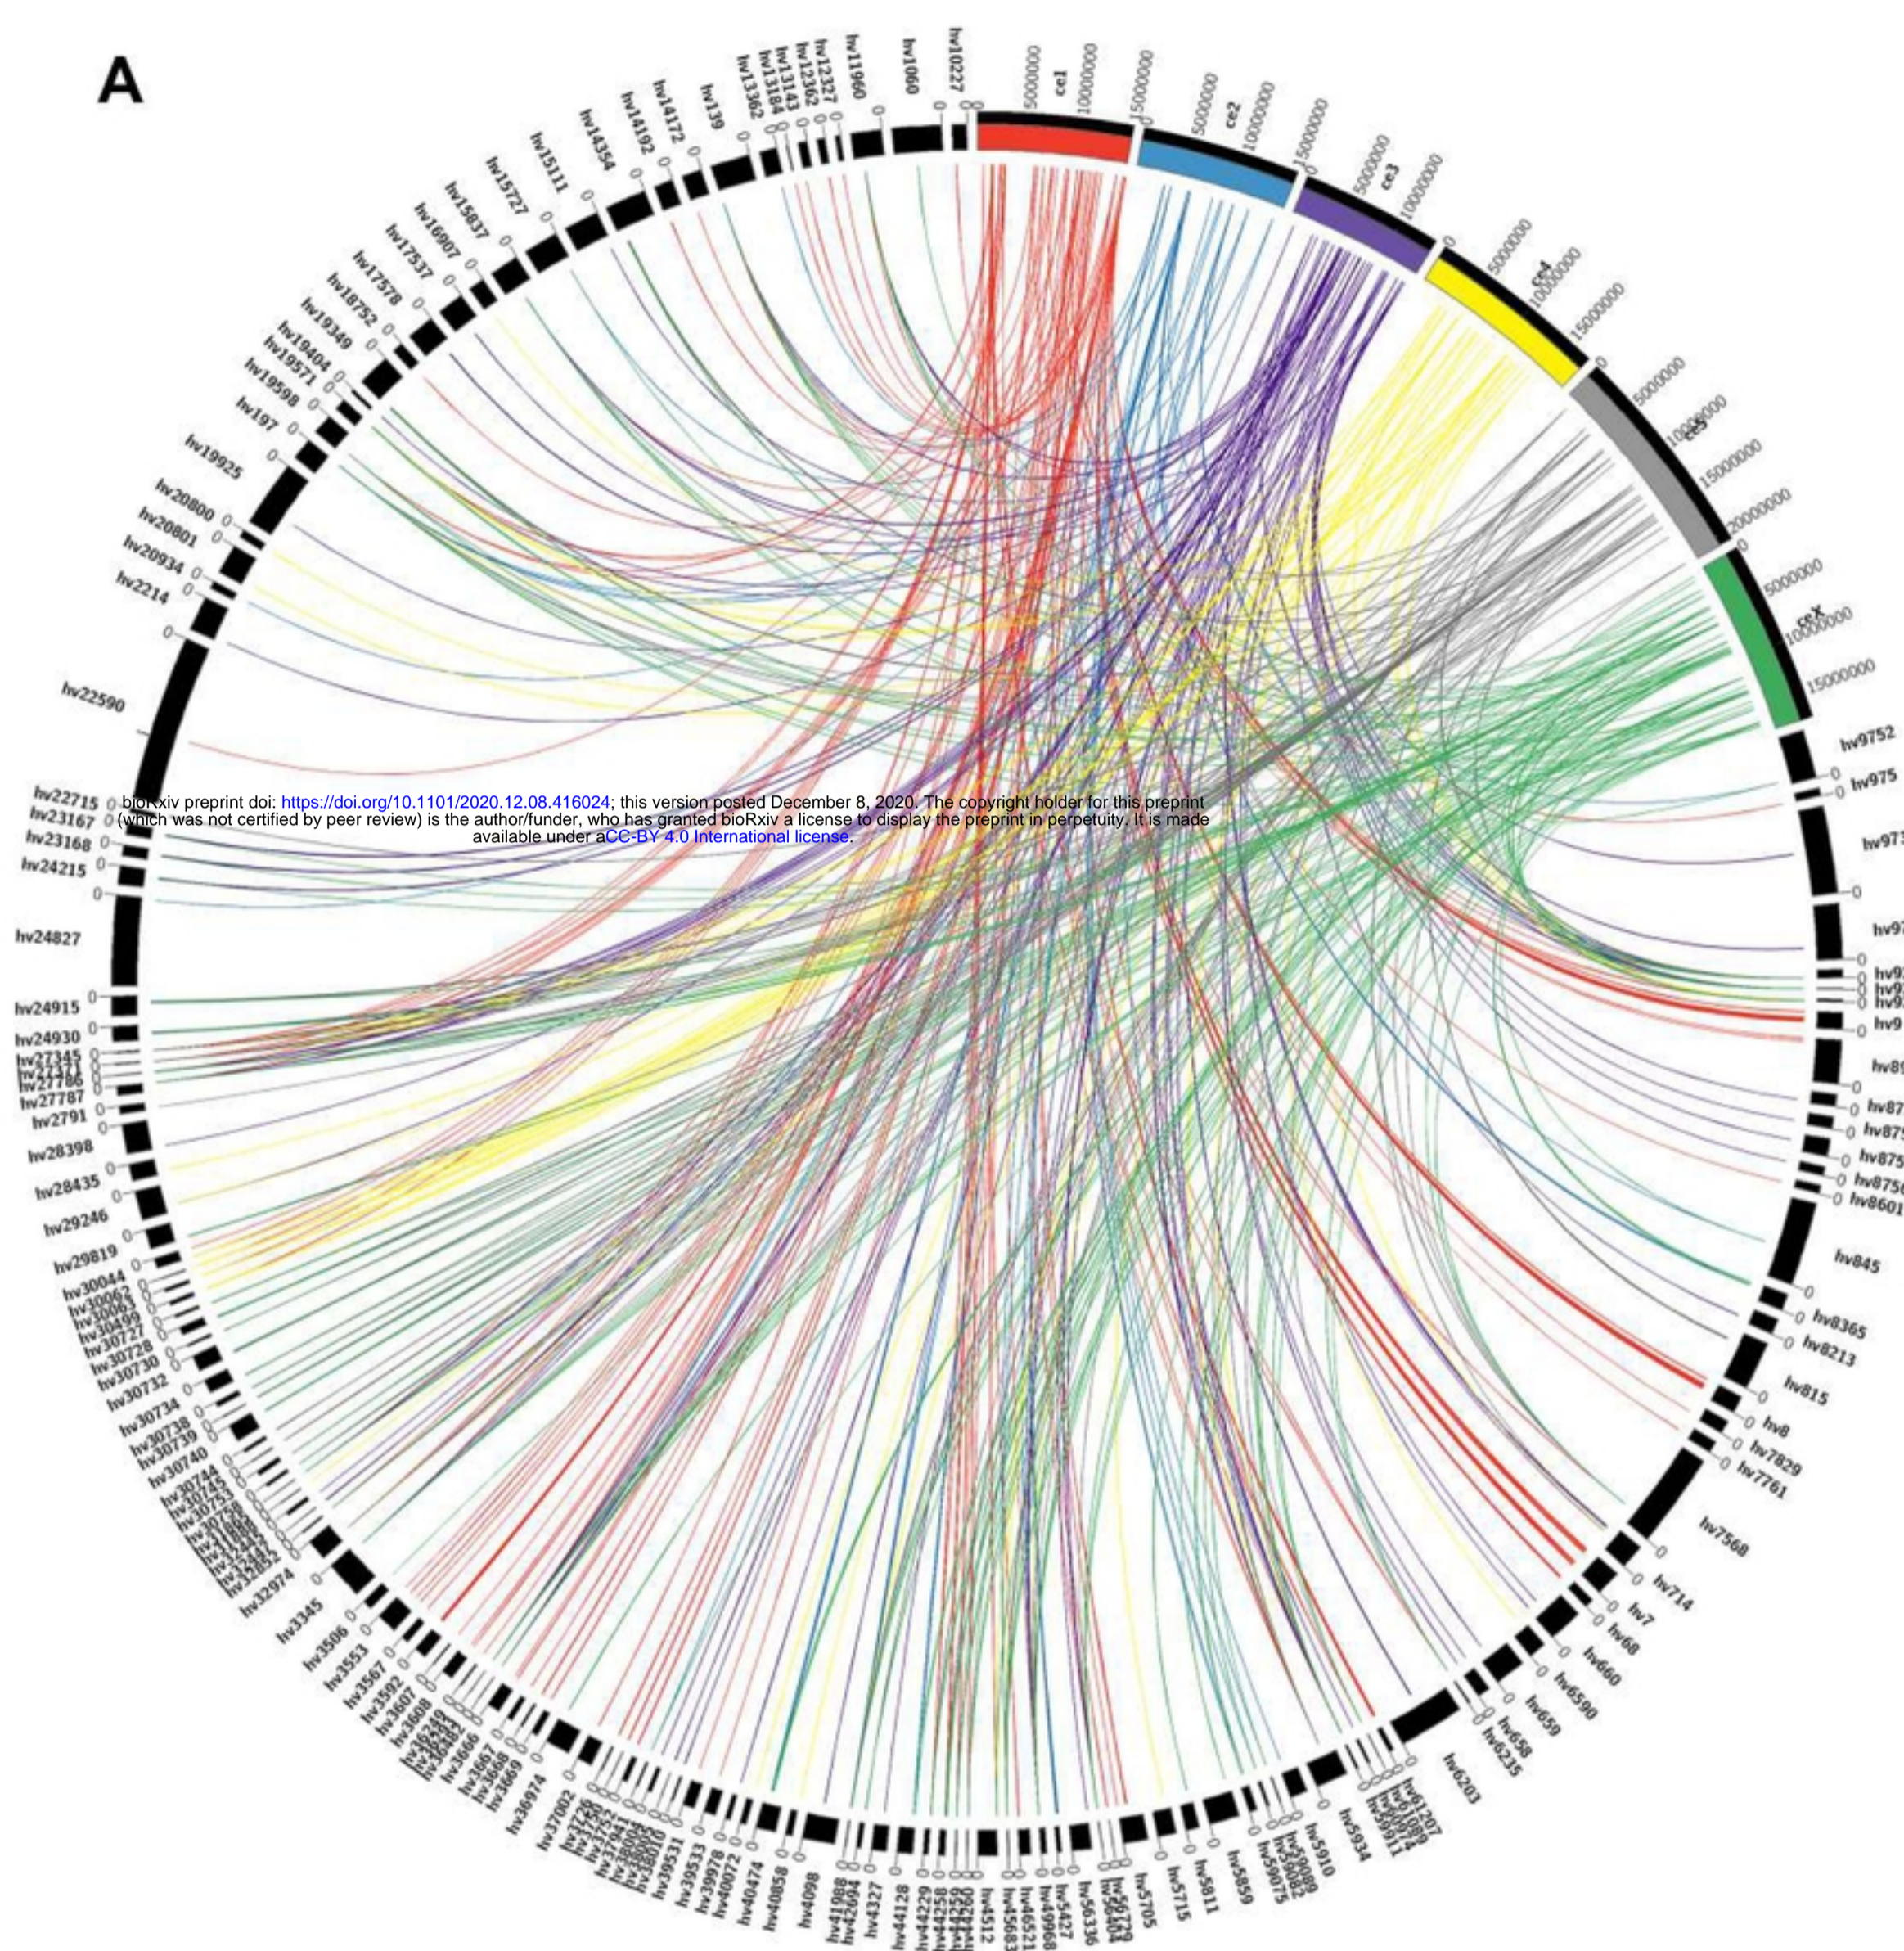**B**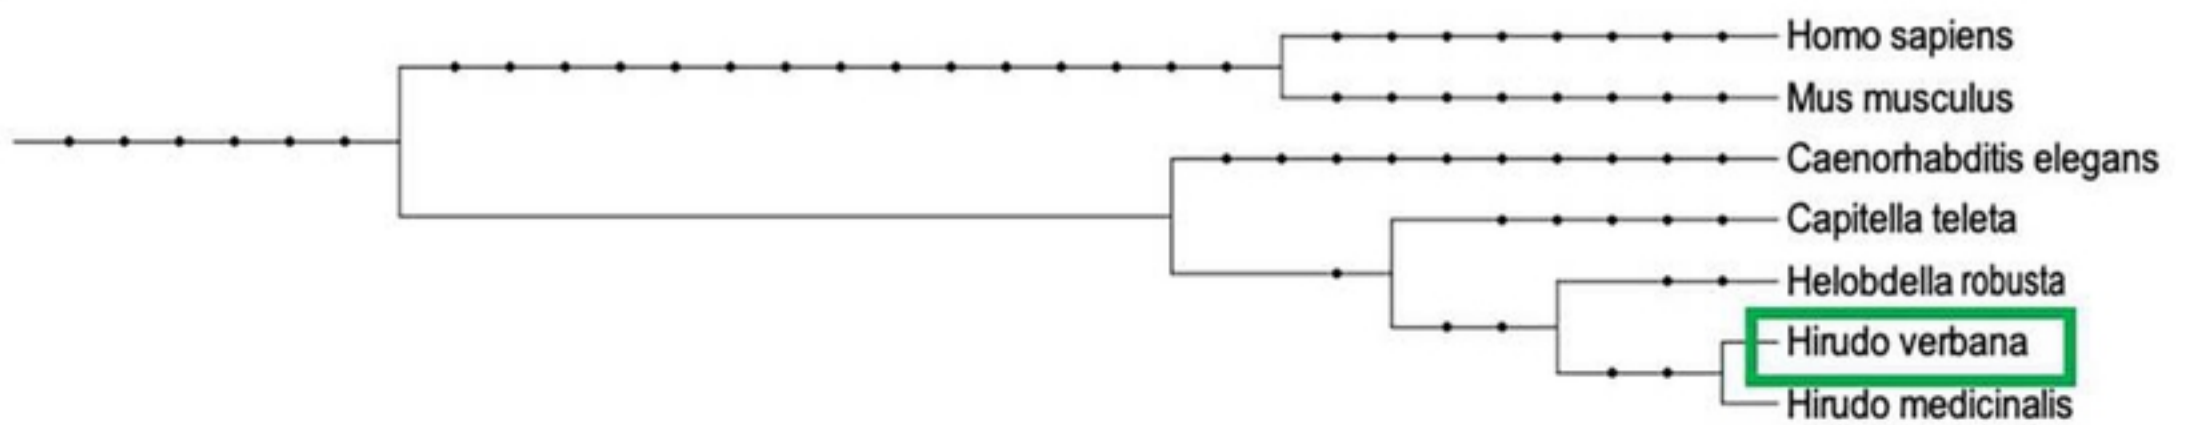

Figure 2
